# Supplementary material for: Predictors of Switching Anti-Tumor Necrosis Factor Therapy in Patients with Ankylosing Spondylitis
Source: PubMed Central journal article supplement (PMC4503780; doi:10.1371/journal.pone.0131864), 2015-07-15
Supplement: pone.0131864.s001.pdf [file pone.0131864.s001.pdf]

Figure A. Survival curves of the three TNF- $\alpha$  inhibitors.

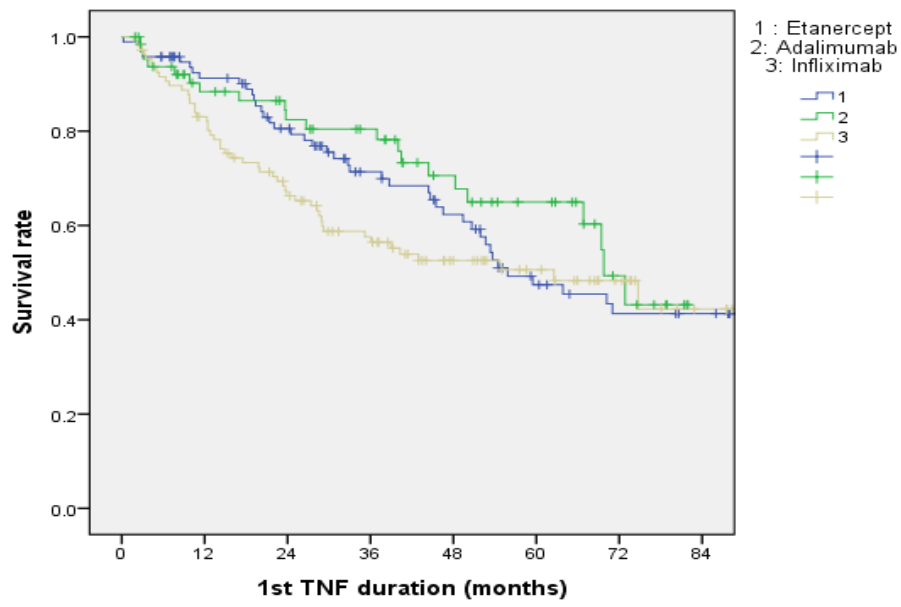

Table A. Survival rates of the three TNF- $\alpha$  inhibitors.

|        | Infliximab (%) | Etanercept(%) | Adalimumab(%) |
|--------|----------------|---------------|---------------|
| 1 year | 66             | 81            | 83            |
| 2 year | 58             | 71            | 81            |
| 3 year | 52             | 62            | 71            |
| 4 year | 50             | 47            | 64            |
| 5 year | 48             | 42            | 51            |
| 6 year | 42             | 42            | 40            |
| 7 year | 42             | 42            |               |

Table B. Predictors of TNF- $\alpha$  inhibitor switching excluding the 9 patients who discontinued TNF- $\alpha$  inhibitors due to adverse events.

| Variable                      | Multivariate analysis |                |
|-------------------------------|-----------------------|----------------|
|                               | HR (95% CI)           | <i>p</i> value |
| First TNF- $\alpha$ inhibitor |                       |                |
| Inflixmab                     |                       |                |
| Etanercept                    | 0.729 (0.419-1.269)   | 0.263          |
| Adalimumab                    | 0.410 (0.169-0.996)   | 0.049          |
| History of joint surgery      | 1.775 (0.977-3.225)   | 0.060          |
| Complete ankylosis            | 1.835 (1.080-3.118)   | 0.025          |

Table C. Univariate logistic analysis used to evaluate the predictors of complete discontinuation of TNF- $\alpha$  inhibitors.

| Variable                                    | Univariate analysis |                |
|---------------------------------------------|---------------------|----------------|
|                                             | HR (95% CI)         | <i>p</i> value |
| Age, years                                  | 0.981 (0.957-1.006) | 0.142          |
| Males                                       | 1.740 (0.921-3.287) | 0.088          |
| Disease duration, years                     | 0.942 (0.863-1.029) | 0.188          |
| Smoking                                     | 1.593 (0.834-3.043) | 0.158          |
| Alcohol drinking                            | 0.824 (0.432-1.571) | 0.557          |
| Family history                              | 0.989 (0.304-3.217) | 0.985          |
| History of joint surgery                    | 1.005 (0.398-2.539) | 0.991          |
| Marital status                              | 1.747 (0.575-5.312) | 0.325          |
| More than 12 years of education, years      | 2.170 (0.770-6.112) | 0.143          |
| BMI, kg/m <sup>2</sup>                      | 0.929 (0.797-1.083) | 0.345          |
| Uveitis                                     | 1.838 (0.769-4.392) | 0.171          |
| Peripheral arthritis                        | 0.816 (0.407-1.634) | 0.565          |
| Sacroiliitis Gr IV                          | 0.912 (0.464-1.793) | 0.789          |
| BASDAI                                      | 0.923 (0.745-1.144) | 0.464          |
| WBC, 10 <sup>3</sup> /mm <sup>3</sup>       | 1.000 (1.000-1.000) | 0.240          |
| Hemoglobin, g/dL                            | 1.011 (0.859-1.190) | 0.895          |
| Platelets, 10 <sup>3</sup> /mm <sup>3</sup> | 0.998 (0.995-1.002) | 0.359          |
| ESR, mg/dL                                  | 1.002 (1.000-1.004) | 0.117          |
| CRP, mg/dL                                  | 0.993 (0.897-1.100) | 0.898          |
| AST, U/L                                    | 0.966 (0.924-1.010) | 0.127          |

---

|                                   |                     |       |
|-----------------------------------|---------------------|-------|
| ALT, U/L                          | 0.981 (0.957-1.006) | 0.131 |
| Total bilirubin, mg/dL            | 1.405 (0.391-5.041) | 0.602 |
| Creatinine, mg/dL                 | 0.650 (0.115-3.679) | 0.627 |
| HLA B27 positivity                | 0.584 (0.247-1.380) | 0.221 |
| INH prophylaxis                   | 0.958 (0.546-1.681) | 0.882 |
| NSAIDs                            | 0.760 (0.434-1.332) | 0.339 |
| Prednisolone                      | 0.569 (0.254-1.273) | 0.170 |
| Methotrexate                      | 0.887 (0.474-1.659) | 0.707 |
| Sulfasalazine                     | 0.506 (0.200-1.279) | 0.150 |
| Any DMARDs                        | 0.837 (0.463-1.512) | 0.555 |
| Mean dose of prednisolone, mg/day | 0.947 (0.817-1.097) | 0.467 |
| Mean dose of MTX, mg/week         | 0.953 (0.805-1.128) | 0.575 |
| Mean dose of SSZ, g/day           | 1.001 (0.999-1.002) | 0.489 |
| First TNF- $\alpha$ inhibitor     |                     |       |
| Infliximab                        |                     |       |
| Etanercept                        | 0.879 (0.443-1.745) | 0.713 |
| Adalimumab                        | 1.195 (0.604-2.366) | 0.609 |

---

Table D. Comorbid conditions of patients according to whether they subsequently switched or not.

|                        | Non-switchers | Switchers  | $\chi^2$ |
|------------------------|---------------|------------|----------|
| Comorbidity            | 22 (11.1%)    | 14 (20.0%) | 0.059    |
| Hypertension           | 11 (5.5%)     | 7 (10.0%)  | 0.198    |
| Diabetes mellitus      | 11 (5.5%)     | 4 (5.7%)   | 1.000    |
| Ischemic heart disease | 2 (1.0%)      | 0          | 1.000    |
| Chronic liver disease  | 2 (1.0%)      | 2 (2.9%)   | 0.278    |

Table E. Cox proportional regression analysis used to evaluate predictors of TNF- $\alpha$  inhibitor switching after adjusted for age, gender, disease duration, and BASDAI using propensity score matching.

| Variable                      | Multivariate analysis |                |
|-------------------------------|-----------------------|----------------|
|                               | HR (95% CI)           | <i>p</i> value |
| First TNF- $\alpha$ inhibitor |                       |                |
| Inflixmab                     |                       |                |
| Etanercept                    | 0.671 (0.346-1.303)   | 0.239          |
| Adalimumab                    | 0.258 (0.104-0.639)   | 0.003          |

Table F. Baseline characteristics and laboratory findings of patients starting their first TNF- $\alpha$  inhibitor according to TNF- $\alpha$  inhibitor using ANOVA test.

| Variables                                                   | Infliximab<br>(n = 108) | Etanercept<br>(n = 95) | Adalimumab<br>(n = 66) | F     | p-value |
|-------------------------------------------------------------|-------------------------|------------------------|------------------------|-------|---------|
| Age, years                                                  | 38.6 $\pm$ 12.3*        | 34.5 $\pm$ 11.5*       | 37.2 $\pm$ 11.7        | 3.049 | 0.049   |
| Disease duration,<br>years                                  | 3.5 $\pm$ 4.5           | 3.0 $\pm$ 3.9          | 3.4 $\pm$ 4.2          | 0.482 | 0.618   |
| Duration of first<br>TNF- $\alpha$ inhibitor<br>use, months | 36.3 $\pm$ 26.0         | 44.8 $\pm$ 30.3        | 38.0 $\pm$ 26.1        | 2.603 | 0.076   |
| BMI, kg/m <sup>2</sup>                                      | 24.0 $\pm$ 3.6          | 23.2 $\pm$ 3.8         | 21.9 $\pm$ 1.9         | 2.394 | 0.096   |
| BASDAI                                                      | 6.8 $\pm$ 1.4           | 7.0 $\pm$ 1.3          | 6.8 $\pm$ 1.3          | 0.516 | 0.597   |
| WBC, 10 <sup>3</sup> /mm <sup>3</sup>                       | 8.2 $\pm$ 2.1           | 8.3 $\pm$ 2.6          | 8.2 $\pm$ 1.7          | 0.032 | 0.968   |
| Hemoglobin, g/dL                                            | 12.9 $\pm$ 1.9*         | 13.6 $\pm$ 1.7*        | 13.4 $\pm$ 1.8         | 3.783 | 0.024   |
| Platelets, 10 <sup>3</sup> /mm <sup>3</sup>                 | 331.0 $\pm$ 114.1       | 310.1 $\pm$ 78.4       | 302.6 $\pm$ 80.0       | 2.076 | 0.127   |
| ESR, mm/h                                                   | 70.4 $\pm$ 108.3*       | 44.3 $\pm$ 31.4*       | 50.9 $\pm$ 35.2        | 3.378 | 0.036   |
| CRP, mg/dL                                                  | 3.3 $\pm$ 3.5*          | 2.5 $\pm$ 2.7          | 2.0 $\pm$ 2.2*         | 4.097 | 0.018   |
| AST, U/L                                                    | 24.4 $\pm$ 23.7         | 23.3 $\pm$ 13.8        | 23.3 $\pm$ 11.6        | 0.117 | 0.890   |
| ALT, U/L                                                    | 21.0 $\pm$ 15.9         | 22.3 $\pm$ 23.0        | 23.6 $\pm$ 20.4        | 0.372 | 0.690   |
| Total bilirubin,<br>mg/dL                                   | 0.57 $\pm$ 0.21         | 0.58 $\pm$ 0.24        | 0.58 $\pm$ 0.20        | 0.052 | 0.950   |
| Creatinine, mg/dL                                           | 0.75 $\pm$ 0.30         | 0.79 $\pm$ 0.16        | 0.75 $\pm$ 0.21        | 0.855 | 0.426   |
| Mean dose of<br>prednisolone,                               | 1.0 $\pm$ 3.5           | 1.2 $\pm$ 2.6          | 0.8 $\pm$ 1.7          | 0.500 | 0.607   |



mg/day

Mean dose of

|               |                       |                       |                       |       |        |
|---------------|-----------------------|-----------------------|-----------------------|-------|--------|
| methotrexate, | 11.9±3.5 <sup>+</sup> | 8.9±2.4 <sup>*+</sup> | 12.1±4.0 <sup>*</sup> | 8.802 | <0.001 |
|---------------|-----------------------|-----------------------|-----------------------|-------|--------|

mg/week

Mean dose of

|                      |                      |                      |         |       |       |
|----------------------|----------------------|----------------------|---------|-------|-------|
| sulfasalazine, g/day | 1.4±0.5 <sup>*</sup> | 1.1±0.5 <sup>*</sup> | 1.3±0.5 | 3.497 | 0.038 |
|----------------------|----------------------|----------------------|---------|-------|-------|

---

<sup>\*</sup>, <sup>+</sup> p < 0.05 by Tukey and Tamhane tests, respectively.

Table G. Baseline characteristics and laboratory findings of patients starting their first TNF- $\alpha$  inhibitor according to TNF- $\alpha$  inhibitor using  $\chi^2$  test.

| Variable                           | Infliximab<br>(n=108) | Etanercept<br>(n=95) | Adalimumab<br>(n=66) | $\chi^2$ |
|------------------------------------|-----------------------|----------------------|----------------------|----------|
| Male                               | 84 (77.8%)            | 85 (89.5%)           | 49 (74.2%)           | 0.028    |
| Smoking                            | 25 (30%)              | 35 (44.3%)           | 16 (37.2%)           | 0.214    |
| Alcohol                            | 33 (39.8%)            | 30 (38.0%)           | 20 (46.5%)           | 0.646    |
| Family history                     | 9 (10.1%)             | 5 (6.3%)             | 3 (6.3%)             | 0.592    |
| History of joint surgery           | 11 (10.2%)            | 22 (23.2%)           | 4 (6.1%)             | 0.003    |
| Marital status                     | 38 (71.7%)            | 30 (63.8%)           | 9 (60.0%)            | 0.584    |
| More than 12 years of<br>education | 24 (50.0%)            | 23 (51.1%)           | 5 (35.7%)            | 0.582    |
| Uveitis                            | 11 (10.9%)            | 14 (16.7%)           | 12 (20.3%)           | 0.245    |
| Peripheral arthritis               | 26 (24.5%)            | 24 (25.8%)           | 17 (25.8%)           | 0.974    |
| Complete ankylosis                 | 30 (29.1%)            | 31 (33.7%)           | 20 (30.8%)           | 0.787    |
| HLA B27 positivity                 | 87 (87%)              | 84 (91.3%)           | 59 (93.7%)           | 0.275    |
| INH prophylaxis                    | 50 (46.3%)            | 51 (53.7%)           | 33 (50.0%)           | 0.773    |
| NSAIDs                             | 52 (48.1%)            | 61 (64.2%)           | 35 (53.0%)           | 0.067    |
| Prednisolone                       | 13 (12.0%)            | 20 (21.1%)           | 13 (19.7%)           | 0.191    |
| Methotrexate                       | 31 (28.7%)            | 35 (36.8%)           | 9 (13.6%)            | 0.005    |
| Sulfasalazine                      | 18 (16.7%)            | 26 (27.4%)           | 10 (15.2%)           | 0.085    |
| Any DMARDs                         | 40 (37.0%)            | 48 (51.1%)           | 18 (27.3%)           | 0.008    |

DMARDs, disease-modifying anti-rheumatic drugs.
